# Supplementary material for: High-yield lactic acid-mediated route for a g-C3N4 nanosheet photocatalyst with enhanced H2-evolution performance
Source: Royal Society of Chemistry journal article supplement (doi:10.1039/c9nr00887j), 2019-01-01
Supplement: c9nr00887j1.pdf [file c9nr00887j1.pdf]

## Supporting Information

### **High-yield lactic acid-mediated route for g-C<sub>3</sub>N<sub>4</sub> nanosheet photocatalyst with enhanced H<sub>2</sub>-evolution performance**

Xinhe Wu,<sup>a</sup> Duoduo Gao,<sup>b</sup> Huogen Yu<sup>a,b\*</sup> and Jiaguo Yu<sup>c</sup>

<sup>a</sup> State Key Laboratory of Silicate Materials for Architectures, Wuhan University of Technology, Wuhan 430070, People's Republic of China

<sup>b</sup> Department of Chemistry, School of Chemistry, Chemical Engineering and Life Sciences, Wuhan University of Technology, Wuhan 430070, People's Republic of China

<sup>c</sup> State Key Laboratory of Advanced Technology for Material Synthesis and Processing, Wuhan University of Technology, Wuhan 430070, People's Republic of China

Tel: 0086-27-87756662, Fax: 0086-27-87879468

E-mail: yuhuogen@whut.edu.cn (H.Yu)

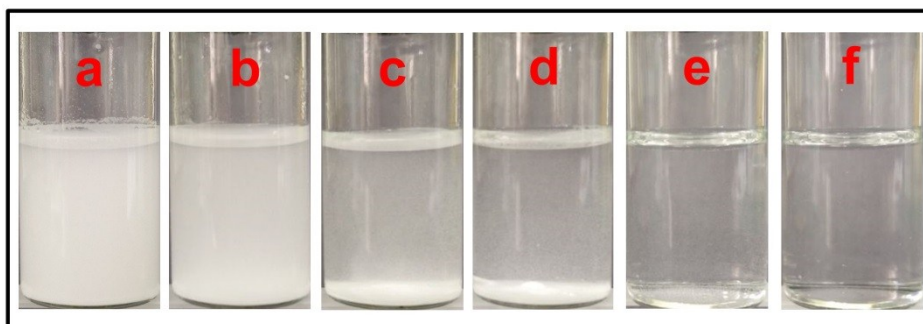

**Fig. S1** The optical picture of 100 mg melamine powder dispersing into 10 mL lactic acid solution containing different dosage of lactic acid for (a) 0  $\mu\text{L}$ , (b) 10  $\mu\text{L}$ , (c) 20  $\mu\text{L}$ , (d) 30  $\mu\text{L}$ , (e) 50  $\mu\text{L}$  and (f) 80  $\mu\text{L}$ .

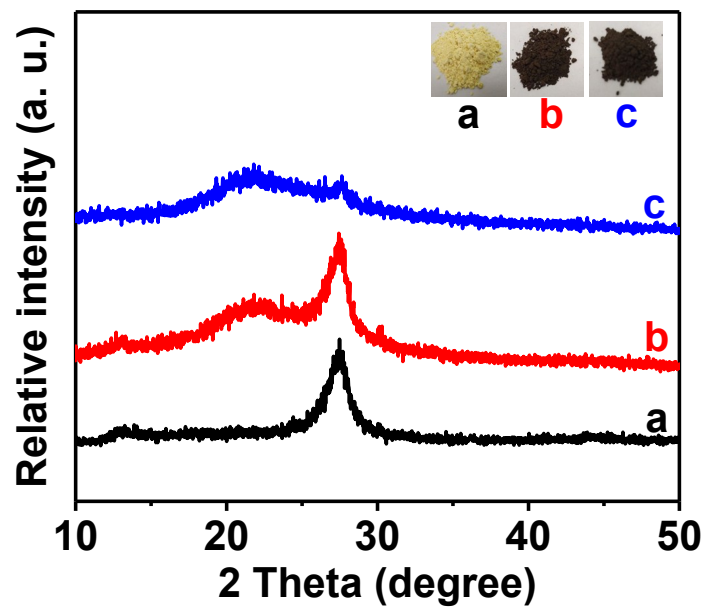

**Fig. S2** XRD patterns and their corresponding photographs of various samples: (a) g-C<sub>3</sub>N<sub>4</sub>(700μL), (b) g-C<sub>3</sub>N<sub>4</sub>(800μL) and (c) g-C<sub>3</sub>N<sub>4</sub>(1000μL).

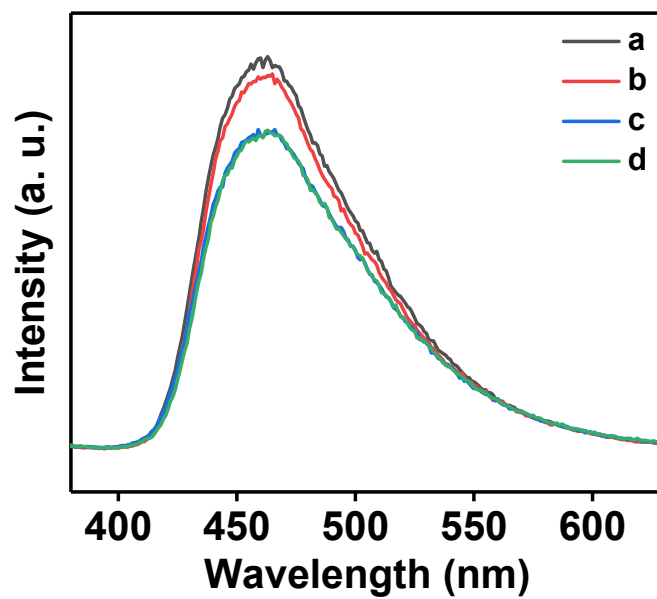

**Fig. S3** The PL emission spectra of various samples: (a) bulk g-C<sub>3</sub>N<sub>4</sub>, (b) g-C<sub>3</sub>N<sub>4</sub>(50 $\mu$ L), (c) g-C<sub>3</sub>N<sub>4</sub>(500 $\mu$ L) and (d) g-C<sub>3</sub>N<sub>4</sub>(700 $\mu$ L).

**Table S1.** The masses of the bulk g-C<sub>3</sub>N<sub>4</sub>, g-C<sub>3</sub>N<sub>4</sub>(50μL), g-C<sub>3</sub>N<sub>4</sub>(500μL) and g-C<sub>3</sub>N<sub>4</sub>(700μL), together with those of MA and LA used for preparing them.

| Samples                                 | Precursors   |                  | Bulk g-C <sub>3</sub> N <sub>4</sub> products (g) | Nanosheet products (g) | <sup>a</sup> Nanosheet yield (wt %) |
|-----------------------------------------|--------------|------------------|---------------------------------------------------|------------------------|-------------------------------------|
|                                         | Melamine (g) | Lactic acid (μL) |                                                   |                        |                                     |
| bulk g-C <sub>3</sub> N <sub>4</sub>    | 2.0          | 0                | 0.5796                                            | 0.0278                 | <sup>b</sup> 1.39 %                 |
| g-C <sub>3</sub> N <sub>4</sub> (50μL)  | 2.0          | 50               | ~                                                 | 0.6371                 | <sup>c</sup> 31.86 %                |
| g-C <sub>3</sub> N <sub>4</sub> (500μL) | 2.0          | 500              | ~                                                 | 0.7033                 | <sup>c</sup> 35.16 %                |
| g-C <sub>3</sub> N <sub>4</sub> (700μL) | 2.0          | 700              | ~                                                 | 0.5245                 | <sup>c</sup> 26.23 %                |

<sup>a</sup>The yield is the transformation ratio from melamine precursor to g-C<sub>3</sub>N<sub>4</sub> nanosheets.

<sup>b</sup>The yield is obtained from a well-known two-step calcination method (twice calcination at 550 °C for 4 h).

<sup>c</sup>The yield is obtained from the present lactic acid-mediated route (one-step calcination at 550 °C for 4 h).

**Table S2.** The specific surface area, pore volume and average pore size of various samples according to BET results.

| Sample                                       | $S_{\text{BET}}$<br>( $\text{m}^2 \text{g}^{-1}$ ) | Pore volume<br>( $\text{cm}^3 \text{g}^{-1}$ ) | Average pore<br>size (nm) |
|----------------------------------------------|----------------------------------------------------|------------------------------------------------|---------------------------|
| (a) bulk $\text{g-C}_3\text{N}_4$            | 5.36                                               | 0.09                                           | 48.30                     |
| (b) $\text{g-C}_3\text{N}_4(50\mu\text{L})$  | 22.32                                              | 0.10                                           | 31.49                     |
| (c) $\text{g-C}_3\text{N}_4(500\mu\text{L})$ | 31.34                                              | 0.13                                           | 21.25                     |
| (d) $\text{g-C}_3\text{N}_4(700\mu\text{L})$ | 14.49                                              | 0.11                                           | 30.52                     |

**Table S3.** The element components of various samples according to XPS results.

| Sample                                       | C     | N     | O    |
|----------------------------------------------|-------|-------|------|
| (a) bulk $\text{g-C}_3\text{N}_4$            | 41.56 | 56.55 | 1.89 |
| (b) $\text{g-C}_3\text{N}_4(50\mu\text{L})$  | 42.32 | 54.75 | 2.93 |
| (c) $\text{g-C}_3\text{N}_4(500\mu\text{L})$ | 42.17 | 55.62 | 2.21 |
| (d) $\text{g-C}_3\text{N}_4(700\mu\text{L})$ | 42.96 | 54.14 | 2.90 |
